# Supplementary material
Source: HighWire-hosted journal article supplement (http://dmd.aspetjournals.org/highwire/filestream/65931/field_highwire_adjunct_files/0/DMD28522_Supplemental_data.pdf)

**Supplemental Data****Figure Legends**

**Figure 7. Effect of extracellular pH on solute transport by rat Oatp1a5, human OATP1A2, and human OATP2B1.** COS cells were transiently transfected with (A, B) human OATP1A2, (C, D) rat Oatp1a5, (E, F) human OATP2B1 expression plasmid or a mixture of control plasmids. The transfected COS cells were pre-incubated for 30 min in uptake buffers at the indicated pH, and then incubated for 10 min in the same buffer plus 5  $\mu\text{M}$  [ $^3\text{H}$ ]taurocholate or [ $^3\text{H}$ ]estrone-3-sulfate at 37°C. The cells were then processed to determine the cell-associated protein and radioactivity. Each bar represents the mean  $\pm$  SEM of triplicate determinations. \*\*  $P < 0.005$ , versus control plasmids-transfected cells (YFP).

**Figure 8. Uptake of radiolabeled solutes by MDCK-rat Oatp1a5 cells.** MDCK-rat Oatp1a5 cells were incubated with (Oatp1a5) or without (control) sodium-butyrate to induce Oatp1a5 expression. After 20 h, the cells were washed and incubated in DMEM for 10 min at 37°C with the indicated concentrations of (A) [ $^3\text{H}$ ]azithromycin, (B) [ $^3\text{H}$ ]taurocholate, or (C) [ $^3\text{H}$ ]clarithromycin and then processed to determine cell-associated radioactivity. Each bar represents the mean  $\pm$  SEM of triplicate determinations. \*\*  $P < 0.005$ , versus uninduced cells.

**Figure 9. Inhibition of estrone-3-sulfate uptake by macrolides in mouse Oatp2b1-transfected COS cells.** COS cells were transiently transfected with mouse Oatp2b1 or control expression plasmid. The transfected COS cells were incubated for 10 min at 37°C with 5  $\mu\text{M}$  [ $^3\text{H}$ ]estrone-3-sulfate plus 250  $\mu\text{M}$  of the indicated competitor. The Oatp2b1-specific uptake was determined by subtracting the [ $^3\text{H}$ ]estrone-3-sulfate uptake for control expression plasmid-transfected COS cells incubated under parallel conditions. Estrone-3-sulfate uptake in the absence of competitor,  $4.9 \pm 0.1$  pmol $\cdot$ mg cell protein $^{-1}\cdot$ 10 min $^{-1}$ , was set at 100%. Each bar

represents the mean  $\pm$  SEM of triplicate determinations.  $**P < 0.005$  versus cells incubated in the absence of competitor.

**Figure 10. Uptake of radiolabeled solutes by human OATP2B1 and rat Oatp2b1.** COS cells were transiently transfected with (A, B) human OATP2B1 or (C, D) rat Oatp2b1 expression plasmids. The transfected COS cells were incubated for 10 min at 37°C in pH 6.0 buffer with the indicated concentrations of [<sup>3</sup>H]azithromycin, [<sup>3</sup>H]clarithromycin, or [<sup>3</sup>H]estrone-3-sulfate, and then processed to determine cell-associated protein and radioactivity. Each bar represents the mean  $\pm$  SEM (n = 3).  $** P < 0.005$ , versus control plasmid-transfected cells (YFP).

Figure 7

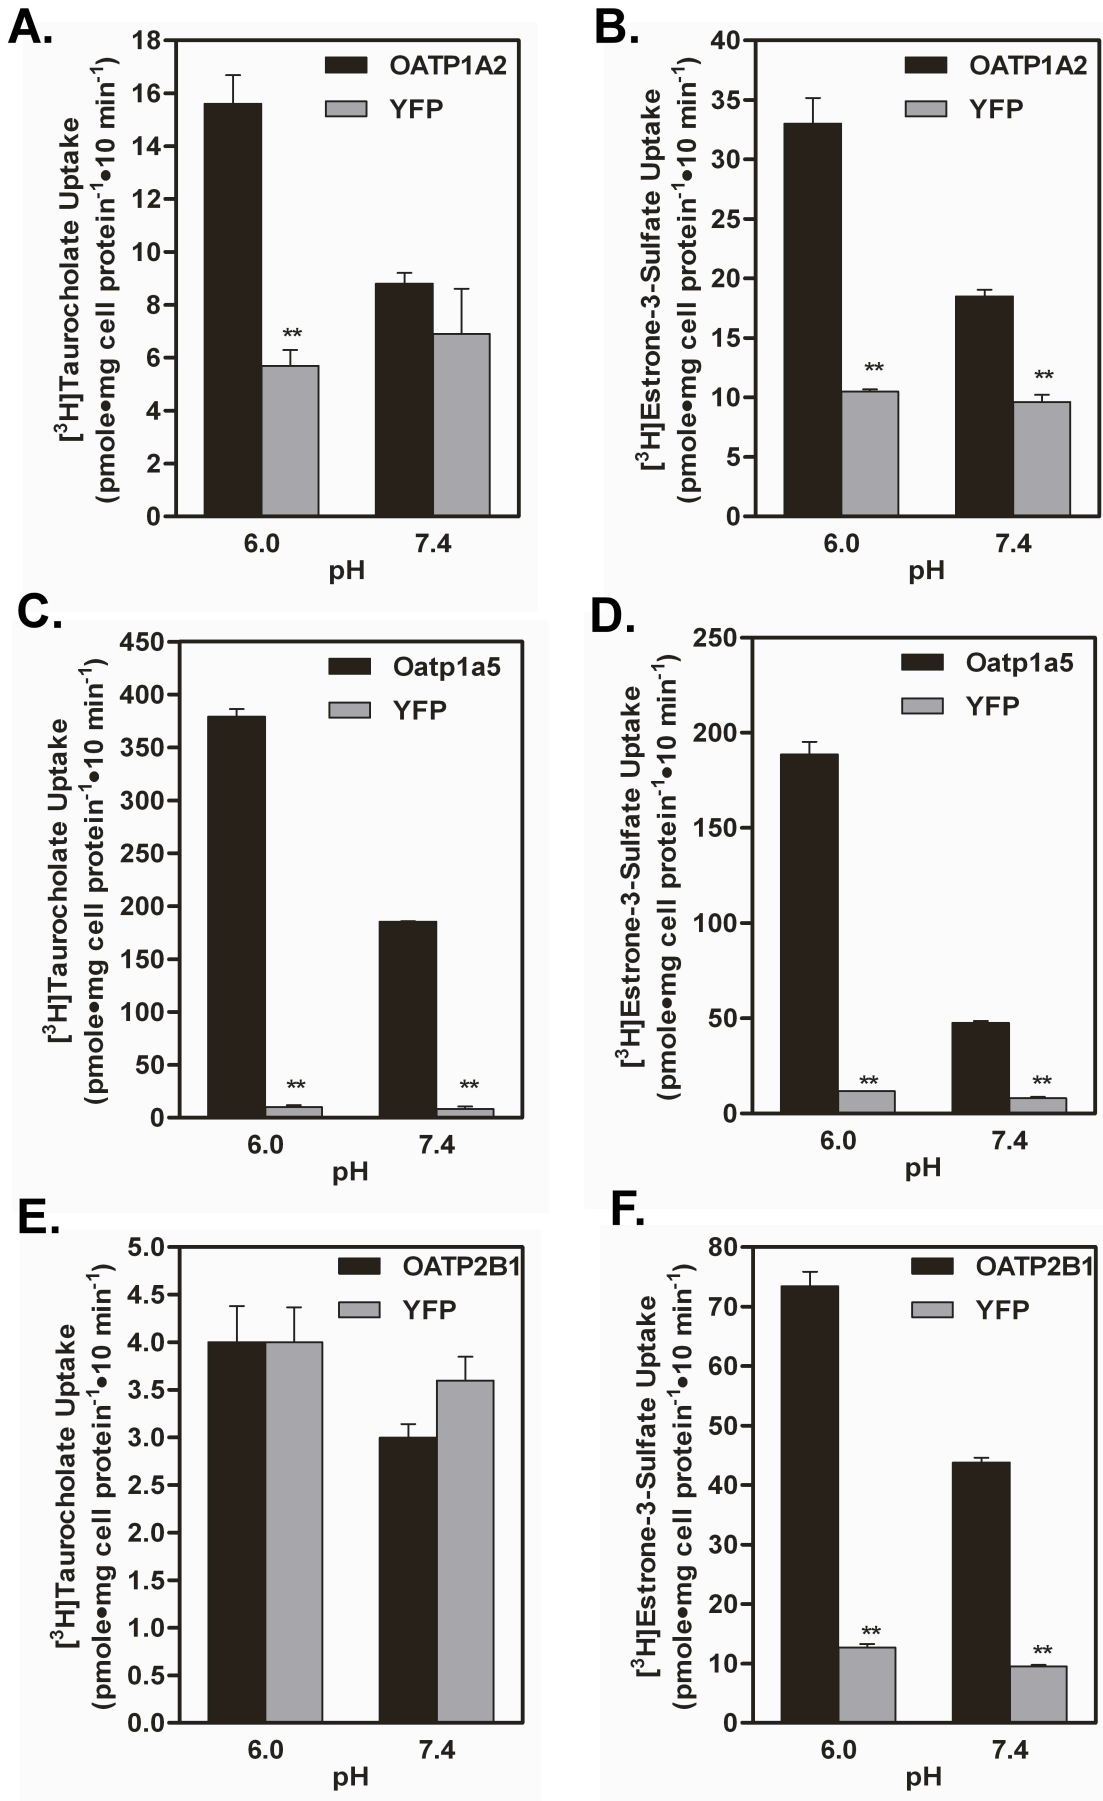

**Figure 8**

**A.**

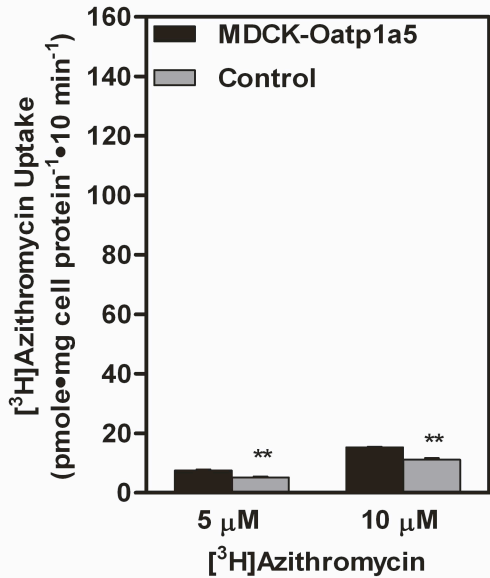

**B.**

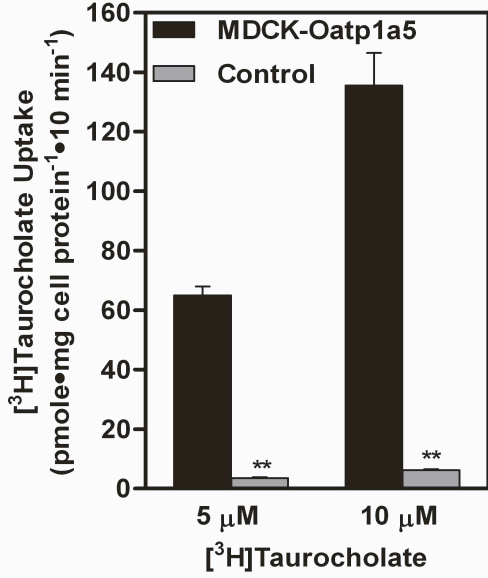

**C.**

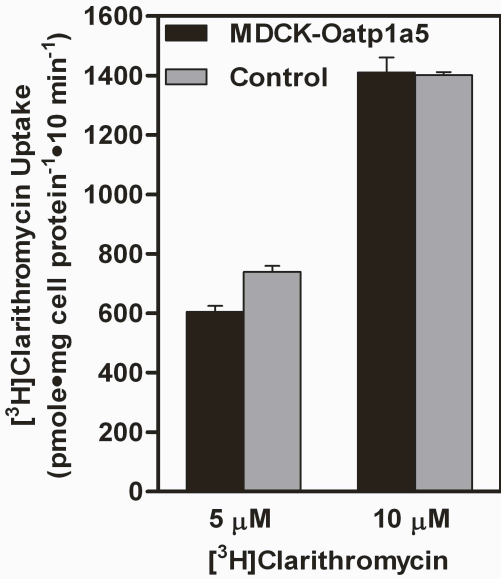

**Figure 9**

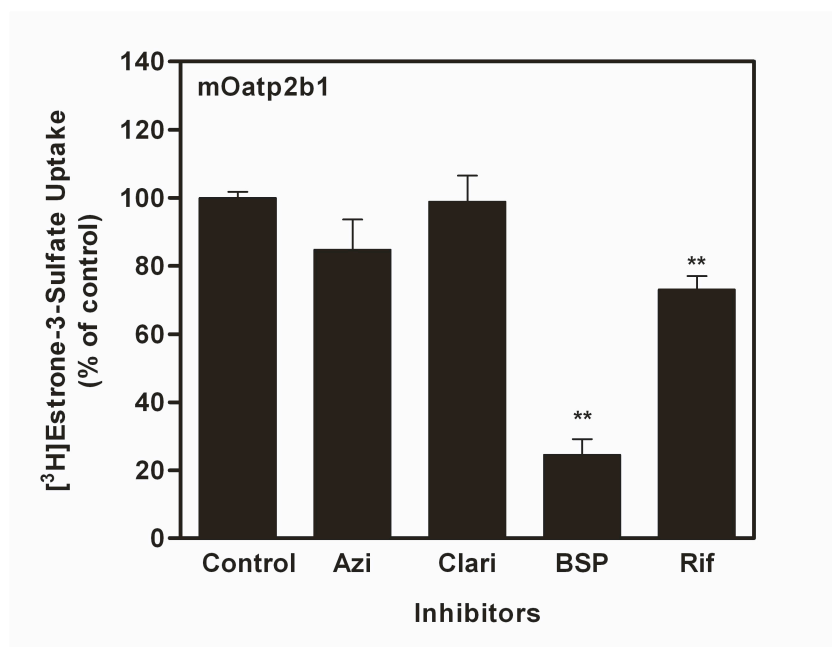

Figure 10

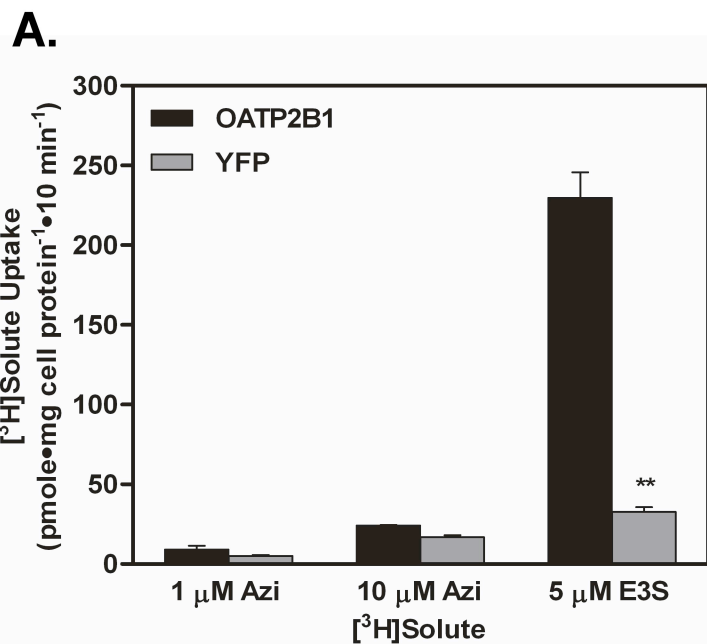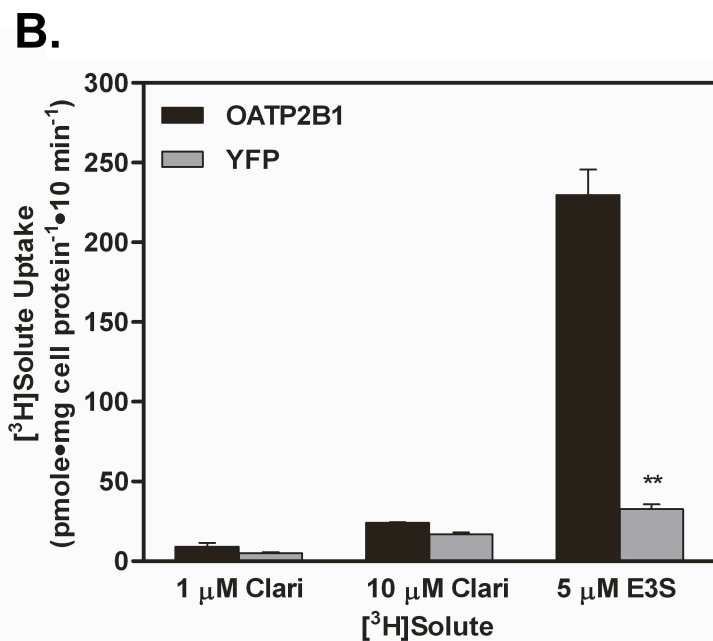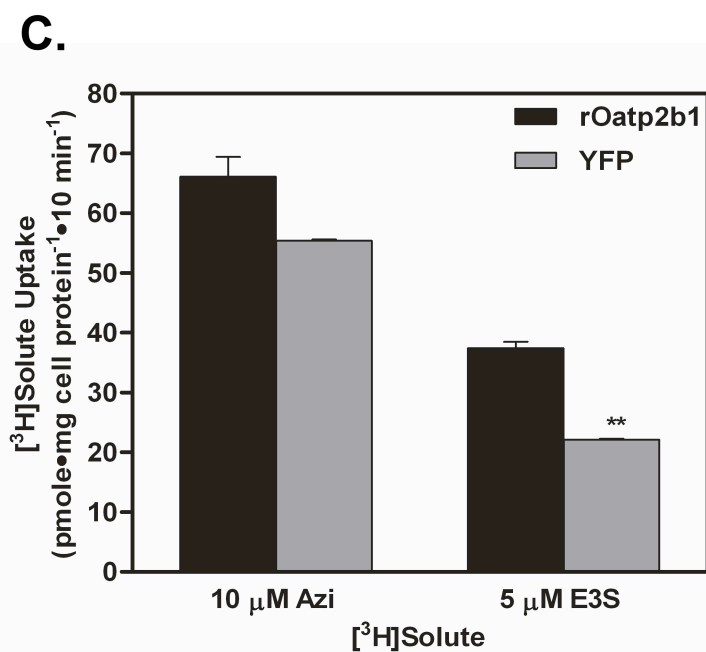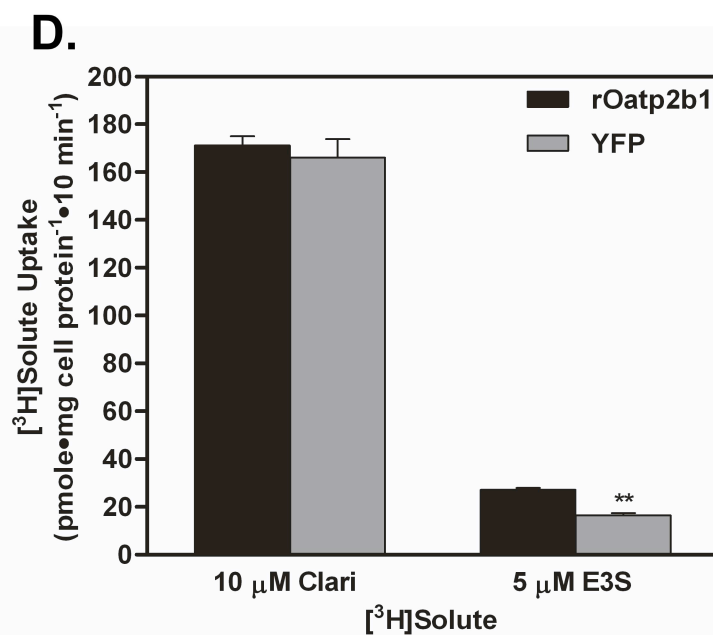

Supplement: DMD28522_Supplemental_data.pdf [file DMD28522_Supplemental_data.pdf]
